# Supplementary material
Source: publisher figshare collection journal article supplement (https://diabetesjournals.figshare.com/ndownloader/files/31456081)
Supplement: Supplementary file 1 [file 31456081]

## Sheet: cph_multipleimputation
	stat	index	age	ALCOFTENcat	em_DIABREL	em_educ2	em_eth	em_SMOKNOW	GENHELcat	GLOBAL	multiMor	PHYSFUN	steps_res2000
1	ChiSq	1	0.28	3.14	0.55	2.63	4.8	0.07	0.57	19.32	3.32	0.25	0.02
2	ChiSq	2	0.28	3.14	0.29	2.69	4.82	0.07	0.62	19.42	3.34	0.37	0.02
3	ChiSq	3	0.29	3.14	0.3	2.38	4.82	0.07	0.61	19.02	3.31	0.38	0.02
4	ChiSq	4	0.28	3.14	0.24	3.01	4.81	0.07	0.55	19.53	3.32	0.27	0.02
5	ChiSq	5	0.28	3.15	0.09	2.17	4.82	0.07	0.55	18.51	3.34	0.35	0.02
6	ChiSq	6	0.28	3.15	0.25	2.28	4.83	0.07	0.56	18.76	3.34	0.34	0.02
7	ChiSq	7	0.29	3.13	0.3	2.45	4.8	0.07	0.61	19	3.32	0.31	0.02
8	ChiSq	8	0.28	3.15	0.47	3.21	4.81	0.07	0.63	20.13	3.33	0.37	0.02
9	ChiSq	9	0.28	3.15	0.25	2.16	4.82	0.07	0.6	18.53	3.34	0.27	0.02
10	ChiSq	10	0.28	3.15	0.43	2.84	4.81	0.07	0.55	19.48	3.34	0.33	0.02
11	ChiSq	11	0.28	3.14	0.25	3.02	4.82	0.07	0.55	19.55	3.34	0.29	0.02
12	ChiSq	12	0.28	3.14	0.45	2.68	4.82	0.07	0.54	19.45	3.31	0.37	0.02
13	ChiSq	13	0.28	3.14	0.14	2.28	4.82	0.07	0.61	18.57	3.34	0.25	0.02
14	ChiSq	14	0.28	3.13	0.48	3.12	4.81	0.07	0.56	19.8	3.32	0.3	0.02
15	ChiSq	15	0.28	3.15	0.46	2.7	4.81	0.07	0.55	19.34	3.34	0.3	0.02
16	ChiSq	16	0.28	3.14	0.1	2.57	4.81	0.07	0.55	18.89	3.32	0.33	0.02
17	ChiSq	17	0.28	3.16	0.21	3.16	4.82	0.07	0.54	19.68	3.35	0.29	0.02
18	ChiSq	18	0.28	3.15	0.11	3.25	4.8	0.07	0.56	19.87	3.32	0.35	0.02
19	ChiSq	19	0.28	3.15	0.25	2.76	4.82	0.07	0.55	19.23	3.34	0.32	0.02
20	ChiSq	20	0.28	3.15	0.38	3.08	4.82	0.07	0.55	19.55	3.32	0.11	0.02
21	ChiSq	21	0.28	3.15	0.67	2.33	4.82	0.07	0.56	19.15	3.34	0.26	0.02
22	ChiSq	22	0.28	3.16	0.29	2.68	4.81	0.07	0.56	19.27	3.34	0.32	0.02
23	ChiSq	23	0.28	3.15	0.14	2.93	4.82	0.07	0.61	19.5	3.34	0.34	0.02
24	ChiSq	24	0.28	3.14	0.22	3.17	4.8	0.07	0.62	19.77	3.34	0.28	0.02
25	ChiSq	25	0.28	3.14	0.31	3.16	4.82	0.07	0.56	19.86	3.35	0.44	0.02
26	ChiSq	26	0.28	3.14	0.23	2.87	4.79	0.07	0.61	19.48	3.33	0.38	0.02
27	ChiSq	27	0.28	3.15	0.18	2.64	4.84	0.07	0.48	18.83	3.33	0.23	0.02
28	ChiSq	28	0.28	3.15	0.13	2.78	4.83	0.07	0.61	19.41	3.34	0.34	0.02
29	ChiSq	29	0.28	3.15	0.19	2.51	4.82	0.07	0.61	18.86	3.34	0.32	0.02
30	ChiSq	30	0.28	3.15	0.48	3.04	4.81	0.07	0.56	19.84	3.34	0.35	0.02
31	ChiSq	31	0.28	3.14	0.37	3.14	4.82	0.07	0.61	19.84	3.31	0.32	0.02
32	ChiSq	32	0.28	3.16	0.09	2.71	4.81	0.07	0.6	19.22	3.35	0.37	0.02
33	ChiSq	33	0.28	3.14	0.13	3	4.82	0.07	0.6	19.57	3.35	0.37	0.02
34	ChiSq	34	0.28	3.15	0.55	3.18	4.8	0.07	0.55	20.08	3.34	0.3	0.02
35	ChiSq	35	0.28	3.15	0.55	3.09	4.82	0.07	0.55	19.95	3.34	0.31	0.02
36	ChiSq	36	0.28	3.15	0.43	2.52	4.82	0.07	0.56	19.22	3.34	0.32	0.02
37	ChiSq	37	0.28	3.16	0.22	2.33	4.83	0.07	0.54	18.83	3.34	0.36	0.02
38	ChiSq	38	0.28	3.15	0.46	2.76	4.83	0.07	0.55	19.42	3.34	0.24	0.02
39	ChiSq	39	0.28	3.14	0.52	3.53	4.81	0.07	0.56	20.65	3.34	0.4	0.02
40	ChiSq	40	0.28	3.15	0.09	3.01	4.8	0.07	0.56	19.42	3.35	0.26	0.02
41	ChiSq	41	0.28	3.15	0.09	2.37	4.83	0.07	0.55	18.68	3.34	0.27	0.02
42	ChiSq	42	0.28	3.14	0.41	2.81	4.81	0.07	0.61	19.52	3.31	0.32	0.02
43	ChiSq	43	0.28	3.14	0.4	2.97	4.83	0.07	0.48	19.66	3.32	0.35	0.02
44	ChiSq	44	0.28	3.15	0.24	2.72	4.82	0.07	0.62	19.2	3.34	0.25	0.02
45	ChiSq	45	0.28	3.14	0.55	2.76	4.82	0.07	0.61	19.64	3.33	0.35	0.02
46	ChiSq	46	0.28	3.14	0.59	3.46	4.81	0.07	0.61	20.56	3.32	0.39	0.02
47	ChiSq	47	0.28	3.16	0.29	2.41	4.81	0.07	0.61	18.88	3.33	0.3	0.02
48	ChiSq	48	0.28	3.15	0.42	2.22	4.84	0.07	0.61	19.02	3.34	0.33	0.02
49	ChiSq	49	0.28	3.15	0.3	2.71	4.81	0.07	0.55	19.16	3.32	0.22	0.02
50	ChiSq	50	0.28	3.15	0.22	3.09	4.83	0.07	0.61	19.64	3.34	0.31	0.02
51	P-value	1	0.6	0.37	0.46	0.27	0.09	0.79	0.75	0.31	0.35	0.62	0.89
52	P-value	2	0.6	0.37	0.59	0.26	0.09	0.79	0.73	0.31	0.34	0.54	0.89
53	P-value	3	0.59	0.37	0.58	0.3	0.09	0.8	0.74	0.33	0.35	0.54	0.88
54	P-value	4	0.59	0.37	0.63	0.22	0.09	0.79	0.76	0.3	0.34	0.6	0.89
55	P-value	5	0.6	0.37	0.76	0.34	0.09	0.79	0.76	0.36	0.34	0.56	0.89
56	P-value	6	0.6	0.37	0.62	0.32	0.09	0.79	0.76	0.34	0.34	0.56	0.89
57	P-value	7	0.59	0.37	0.58	0.29	0.09	0.79	0.74	0.33	0.34	0.58	0.88
58	P-value	8	0.6	0.37	0.49	0.2	0.09	0.79	0.73	0.27	0.34	0.54	0.89
59	P-value	9	0.6	0.37	0.62	0.34	0.09	0.79	0.74	0.36	0.34	0.6	0.89
60	P-value	10	0.6	0.37	0.51	0.24	0.09	0.79	0.76	0.3	0.34	0.56	0.89
61	P-value	11	0.6	0.37	0.62	0.22	0.09	0.79	0.76	0.3	0.34	0.59	0.89
62	P-value	12	0.59	0.37	0.5	0.26	0.09	0.79	0.76	0.3	0.35	0.54	0.89
63	P-value	13	0.6	0.37	0.71	0.32	0.09	0.79	0.74	0.35	0.34	0.62	0.89
64	P-value	14	0.59	0.37	0.49	0.21	0.09	0.79	0.76	0.28	0.34	0.59	0.89
65	P-value	15	0.6	0.37	0.5	0.26	0.09	0.79	0.76	0.31	0.34	0.59	0.89
66	P-value	16	0.59	0.37	0.75	0.28	0.09	0.79	0.76	0.33	0.34	0.57	0.89
67	P-value	17	0.6	0.37	0.64	0.21	0.09	0.79	0.76	0.29	0.34	0.59	0.89
68	P-value	18	0.6	0.37	0.75	0.2	0.09	0.79	0.75	0.28	0.34	0.55	0.89
69	P-value	19	0.6	0.37	0.62	0.25	0.09	0.79	0.76	0.32	0.34	0.57	0.89
70	P-value	20	0.6	0.37	0.54	0.21	0.09	0.79	0.76	0.3	0.35	0.74	0.89
71	P-value	21	0.6	0.37	0.41	0.31	0.09	0.79	0.76	0.32	0.34	0.61	0.89
72	P-value	22	0.6	0.37	0.59	0.26	0.09	0.79	0.76	0.31	0.34	0.57	0.89
73	P-value	23	0.6	0.37	0.71	0.23	0.09	0.79	0.74	0.3	0.34	0.56	0.89
74	P-value	24	0.6	0.37	0.64	0.2	0.09	0.79	0.73	0.29	0.34	0.6	0.89
75	P-value	25	0.6	0.37	0.58	0.21	0.09	0.79	0.75	0.28	0.34	0.51	0.89
76	P-value	26	0.59	0.37	0.63	0.24	0.09	0.79	0.74	0.3	0.34	0.54	0.89
77	P-value	27	0.6	0.37	0.67	0.27	0.09	0.79	0.79	0.34	0.34	0.64	0.89
78	P-value	28	0.6	0.37	0.71	0.25	0.09	0.79	0.74	0.31	0.34	0.56	0.89
79	P-value	29	0.6	0.37	0.67	0.28	0.09	0.79	0.74	0.34	0.34	0.57	0.89
80	P-value	30	0.6	0.37	0.49	0.22	0.09	0.79	0.76	0.28	0.34	0.55	0.89
81	P-value	31	0.59	0.37	0.54	0.21	0.09	0.79	0.74	0.28	0.35	0.57	0.88
82	P-value	32	0.6	0.37	0.76	0.26	0.09	0.79	0.74	0.32	0.34	0.55	0.89
83	P-value	33	0.6	0.37	0.72	0.22	0.09	0.79	0.74	0.3	0.34	0.54	0.89
84	P-value	34	0.6	0.37	0.46	0.2	0.09	0.79	0.76	0.27	0.34	0.58	0.89
85	P-value	35	0.6	0.37	0.46	0.21	0.09	0.79	0.76	0.28	0.34	0.58	0.89
86	P-value	36	0.6	0.37	0.51	0.28	0.09	0.79	0.76	0.32	0.34	0.57	0.89
87	P-value	37	0.6	0.37	0.64	0.31	0.09	0.79	0.76	0.34	0.34	0.55	0.89
88	P-value	38	0.6	0.37	0.5	0.25	0.09	0.79	0.76	0.3	0.34	0.62	0.89
89	P-value	39	0.6	0.37	0.47	0.17	0.09	0.79	0.76	0.24	0.34	0.53	0.89
90	P-value	40	0.6	0.37	0.76	0.22	0.09	0.79	0.76	0.3	0.34	0.61	0.89
91	P-value	41	0.6	0.37	0.76	0.31	0.09	0.79	0.76	0.35	0.34	0.6	0.89
92	P-value	42	0.59	0.37	0.52	0.25	0.09	0.79	0.74	0.3	0.35	0.57	0.89
93	P-value	43	0.59	0.37	0.53	0.23	0.09	0.79	0.79	0.29	0.34	0.55	0.89
94	P-value	44	0.6	0.37	0.62	0.26	0.09	0.79	0.73	0.32	0.34	0.62	0.89
95	P-value	45	0.6	0.37	0.46	0.25	0.09	0.79	0.74	0.29	0.34	0.55	0.89
96	P-value	46	0.6	0.37	0.44	0.18	0.09	0.79	0.74	0.25	0.34	0.53	0.89
97	P-value	47	0.6	0.37	0.59	0.3	0.09	0.79	0.74	0.34	0.34	0.58	0.89
98	P-value	48	0.6	0.37	0.52	0.33	0.09	0.79	0.74	0.33	0.34	0.56	0.89
99	P-value	49	0.59	0.37	0.58	0.26	0.09	0.79	0.76	0.32	0.34	0.64	0.89
100	P-value	50	0.6	0.37	0.64	0.21	0.09	0.79	0.74	0.29	0.34	0.58	0.89

## Sheet: cph_completecase
	stat	index	age	ALCOFTENcat	avg_bt5_totstep	avg_perc_ge40	avg_pk30	em_DIABREL	em_educ2	em_eth	em_SMOKNOW	GENHELcat	GLOBAL	multiMor	PHYSFUN	steps_res2000
1	ChiSq	steps_res2000	0.24	3.59	NA	NA	NA	0.25	2.35	5.56	0.03	0.3	18.03	1.58	0.34	0.02
2	ChiSq	avg_pk30	0.23	3.61	NA	NA	0.02	0.26	2.34	5.58	0.03	0.3	17.81	1.57	0.34	NA
3	ChiSq	avg_perc_ge40	0.24	3.62	NA	0.02	NA	0.26	2.35	5.55	0.03	0.29	17.99	1.59	0.33	NA
4	ChiSq	avg_bt5_totstep	0.24	3.61	0.01	NA	NA	0.26	2.36	5.55	0.03	0.3	17.77	1.56	0.34	NA
5	P-value	steps_res2000	0.62	0.31	NA	NA	NA	0.61	0.31	0.06	0.87	0.86	0.26	0.21	0.56	0.88
6	P-value	avg_pk30	0.63	0.31	NA	NA	0.9	0.61	0.31	0.06	0.86	0.86	0.27	0.21	0.56	NA
7	P-value	avg_perc_ge40	0.62	0.3	NA	0.9	NA	0.61	0.31	0.06	0.86	0.86	0.26	0.21	0.57	NA
8	P-value	avg_bt5_totstep	0.62	0.31	0.94	NA	NA	0.61	0.31	0.06	0.86	0.86	0.28	0.21	0.56	NA
